# Supplementary material for: Gesundheitsförderung, Stresserleben und Arbeitszufriedenheit bei Pflegeauszubildenden
Source: Springer Nature journal article supplement (doi:10.1007/s11553-024-01101-7), 2024-02-14
Supplement: MOESM7 [file 26733586]

# Onlinematerial 7: Veränderungsscores (T0-T1) zum Zeitpunkt 0,5 Monate nach Intervention im Gruppenvergleich

|  | **Gesundheitliche Verbesserung,** **wenn Vorzeichen:** | **IG (n=47)** | | | **WKG (n=52)** | | | **Gruppenunterschied** | | | |
| --- | --- | --- | --- | --- | --- | --- | --- | --- | --- | --- | --- |
| *MW* | *SD* | *Anteil fehlender Werte in %* | *MW* | *SD* | *Anteil fehlender Werte in %* | *p-Wert (zweiseitig)* | *Cohen's d Punkt-schätzung* | *95% Konfidenzintervall* | |
| *(Differenz T0-T1)* | *(Differenz T0-T1)* | *(Differenz T0-T1)* | *(Differenz T0-T1)* |
| **Gesundheitsbezogene Outcomes** |  |  |  |  |  |  |  |  |  |  |  |
| Häufigkeit Glück | - | -0,10 | 1,11 | 34% | -0,02 | 1,00 | 19% | 0,73 |  |  |  |
| Lebenszufriedenheit | - | -0,23 | 2,06 | 34% | 0,08 | 1,53 | 23% | 0,23 |  |  |  |
| Subjektive Gesundheit | + | -0,25 | 0,76 | 32% | 0,10 | 0,54 | 21% | 0,047 | 0,54 | 0,07 | 1,01 |
| Erholungsfähigkeit: Abschalten | - | -0,04 | 0,56 | 40% | -0,03 | 0,53 | 29% | 0,84 |  |  |  |
| Erholungsfähigkeit: Entspannen (in der Freizeit) | - | 0,15 | 0,62 | 40% | 0,08 | 0,77 | 48% | 0,72 |  |  |  |
| Erholungsfähigkeit: Kontrolle (bei Freizeitgestaltung) | - | 0,17 | 0,75 | 36% | 0,12 | 0,74 | 23% | 0,49 |  |  |  |
| Erholungsfähigkeit: Mastery (Herausforderungen in der Freizeit) | - | -0,04 | 0,69 | 38% | 0,15 | 1,06 | 33% | 0,24 |  |  |  |
| Stress: gesamt | + | 0,95 | 4,03 | 53% | -1,36 | 4,02 | 52% | 0,06 |  |  |  |
| Stress: Subskala Hilflosigkeit | + | 0,70 | 3,74 | 43% | -1,65 | 3,24 | 40% | 0,01 | 0,67 | 0,14 | 1,20 |
| Stress: Subskala Selbstwirksamkeit | - | -0,26 | 1,81 | 51% | -0,21 | 2,23 | 44% | 0,93 |  |  |  |
| Gesundheitliches Wohlbefinden | - | -6,80 | 20,05 | 36% | 1,94 | 21,52 | 37% | 0,10 |  |  |  |
| **Arbeitsbezogene Outcomes** |  |  |  |  |  |  |  |  |  |  |  |
| Arbeitsbezogenes Burnout | + | -3,57 | 13,59 | 53% | -1,84 | 11,33 | 37% | 0,61 |  |  |  |
| Arbeitszufriedenheit: Physische Arbeitsbelastung | - | 0,41 | 1,58 | 43% | -0,19 | 1,31 | 29% | 0,34 |  |  |  |
| Arbeitszufriedenheit: Freiheit, eigene Arbeitsmethoden wählen zu können | - | -0,07 | 1,84 | 40% | 0,00 | 1,80 | 37% | 0,64 |  |  |  |
| Arbeitszufriedenheit: Kolleg*innen und Mitarbeiter*innen | - | 0,33 | 2,27 | 43% | 0,49 | 1,71 | 29% | 0,71 |  |  |  |
| Arbeitszufriedenheit: Anerkennung für die Arbeit | - | 0,59 | 2,10 | 43% | 0,26 | 2,39 | 33% | 0,58 |  |  |  |
| Arbeitszufriedenheit: Menge an Verantwortung | - | 0,31 | 1,72 | 45% | 0,67 | 2,01 | 31% | 0,46 |  |  |  |
| Arbeitszufriedenheit: Einkommen | - | -0,07 | 1,54 | 40% | 0,79 | 1,82 | 25% | 0,04 | 0,51 | 0,01 | 1,00 |
| Arbeitszufriedenheit: Möglichkeit, eigene Fähigkeiten nutzen zu können | - | 0,31 | 1,65 | 38% | 0,75 | 1,65 | 31% | 0,17 |  |  |  |
| Arbeitszufriedenheit: Arbeitsstunden | - | 0,21 | 1,54 | 38% | 0,21 | 1,09 | 27% | 0,95 |  |  |  |
| Arbeitszufriedenheit: Grad der Abwechslung der Arbeitsaufgaben | - | 0,11 | 1,89 | 40% | 0,41 | 2,20 | 35% | 0,34 |  |  |  |
| Arbeitszufriedenheit: gesamt | - | 0,37 | 1,88 | 36% | 0,34 | 1,99 | 27% | 1,00 |  |  |  |
| Wechselmotivation, innerhalb 5 Jahre | + | -0,15 | 0,82 | 43% | -0,21 | 0,88 | 35% | 0,84 |  |  |  |
| Wunsch, Pflegetätigkeit zu beenden | + | -0,41 | 1,40 | 38% | -0,15 | 1,50 | 35% | 0,33 |  |  |  |
| Arbeitsengagement | - | 1,27 | 3,78 | 53% | -1,38 | 5,77 | 44% | 0,07 |  |  |  |
| **Gesundheitskompetenz (Wie einfach/schwierig ist es für Sie …)** |  |  |  |  |  |  |  |  |  |  |  |
| ... zu beurteilen, welche alltäglichen Gewohnheiten Ihre Gesundheit beeinflussen (Hinweis: Trink- und Essgewohnheiten, Bewegung etc.)? | + | -0,04 | 0,60 | 45% | -0,13 | 0,94 | 42% | 0,81 |  |  |  |
| ... Entscheidungen zu treffen, die Ihre Gesundheit und Ihr Wohlbefinden verbessern? | + | 0,00 | 0,73 | 43% | 0,13 | 0,66 | 38% | 0,38 |  |  |  |
| ... Lebensumstände zu beeinflussen, die Auswirkungen auf Ihre Gesundheit und Ihr Wohlbefinden haben (Beruf, Wohnsituation, Mobilität, Freizeitangebote, usw.)? | + | -0,15 | 0,72 | 43% | -0,04 | 0,58 | 46% | 0,36 |  |  |  |
| **Lebensstil: Entspannung** |  |  |  |  |  |  |  |  |  |  |  |
| Subjektive Bedeutung von Entspannung als Teil einer gesunden Lebensführung | - | 0,97 | 2,76 | 36% | 0,50 | 2,35 | 35% | 0,11 |  |  |  |
| Zufriedenheit mit Entspannungsverhalten | - | -0,03 | 2,71 | 36% | -0,31 | 1,72 | 31% | 0,70 |  |  |  |
| Beitrag von Entspannungsmethoden im Alltag zum Wohlbefinden | + | -0,09 | 0,85 | 51% | 0,08 | 0,86 | 52% | 0,52 |  |  |  |
| Tage/Woche Entspannungsmethoden | - | -0,75 | 1,64 | 66% | 0,44 | 1,62 | 69% | 0,05 |  |  |  |
| Selbstfürsorge | - | -0,36 | 1,06 | 34% | -0,28 | 0,89 | 27% | 0,93 |  |  |  |
| **Lebensstil: ausgleichende Bewegung** |  |  |  |  |  |  |  |  |  |  |  |
| Subjektive Bedeutung von Bewegung im Alltag als Teil einer gesunden Lebensführung | - | -0,10 | 3,12 | 38% | -0,15 | 1,18 | 37% | 0,53 |  |  |  |
| Zufriedenheit mit Bewegungsverhalten im Alltag | - | -0,83 | 2,93 | 38% | -0,76 | 2,15 | 29% | 0,55 |  |  |  |
| Beitrag von Bewegung im Alltag zum Wohlbefinden | + | -0,23 | 1,07 | 45% | 0,00 | 0,79 | 37% | 0,60 |  |  |  |
| Tage/Woche an denen ausgleichende Bewegungen integriert werden* | - | -0,33 | 2,64 | 68% | 0,75 | 2,18 | 54% | 0,23 |  |  |  |
| **Lebensstil: Sport** |  |  |  |  |  |  |  |  |  |  |  |
| Subjektive Bedeutung von Sport als Teil einer gesunden Lebensführung | - | -0,20 | 2,61 | 36% | 0,03 | 1,45 | 35% | 0,40 |  |  |  |
| Zufriedenheit mit Sportverhalten | - | -0,30 | 2,67 | 36% | 0,74 | 2,22 | 35% | 0,04 | 0,42 | 0,07 | 0,92 |
| Beitrag von Sport zum Wohlbefinden | + | -0,07 | 1,05 | 40% | 0,03 | 0,68 | 44% | 0,95 |  |  |  |
| Tage / Woche Körperliche Aktivität: Ausdaueraktivität** | - | -0,13 | 1,30 | 68% | 0,42 | 1,07 | 54% | 0,06 |  |  |  |
| Tage / Woche Körperliche Aktivität: Muskelkräftigung*** | - | 0,03 | 3,11 | 66% | 0,44 | 1,57 | 65% | 0,51 |  |  |  |
| Stunden / Woche Körperliche Aktivität: Ausdaueraktivität und Muskelkräftigung**** | - | 2,21 | 3,84 | 85% | 0,62 | 2,51 | 79% | 0,30 |  |  |  |
| **Lebensstil: Ernährung** |  |  |  |  |  |  |  |  |  |  |  |
| Subjektive Bedeutung von Ernährung als Teil einer gesunden Lebensführung | - | 0,07 | 2,76 | 43% | -0,15 | 2,39 | 35% | 0,99 |  |  |  |
| Zufriedenheit mit Ernährungsverhalten | - | 0,14 | 2,90 | 40% | 0,23 | 2,47 | 33% | 0,67 |  |  |  |
| Beitrag von Ernährung zum Wohlbefinden | + | -0,07 | 0,92 | 43% | -0,06 | 0,70 | 37% | 0,80 |  |  |  |
| Tage/Woche bewusst Zeit nehmen für gesunde Ernährung, in den letzten 4 Wochen | + | -0,23 | 0,99 | 45% | -0,03 | 0,88 | 37% | 0,63 |  |  |  |
| **Lebensstil: Medikamente** |  |  |  |  |  |  |  |  |  |  |  |
| Summe an Arten von Medikamenten, in den letzten vier Wochen***** | - | -0,07 | 0,65 | 38% | 0,03 | 0,82 | 33% | 0,32 |  |  |  |
| Falls ja: Verordnung durch Arzt/Ärztin | - | 0,13 | 0,35 | 83% | 0,15 | 0,55 | 75% | 0,85 |  |  |  |
| **Lebensstil: Rauchen und Alkohol** |  |  |  |  |  |  |  |  |  |  |  |
| Rauchverhalten (inkl. E-Zigaretten), in den letzten 4 Wochen | - | -0,03 | 0,33 | 38% | 0,06 | 0,24 | 33% | 0,20 |  |  |  |
| Alkoholkonsum/Woche, in den letzten 4 Wochen | - | 0,07 | 0,64 | 36% | -0,11 | 0,47 | 33% | 0,25 |  |  |  |
| Hinweise:    Für den Gruppenvergleich wurden die Differenzen verglichen, d. h. T0 minus T1. Ob sich die Werte im Zeitverlauf verbessert oder verschlechtert haben, ist am Vorzeichen erkennbar (siehe Spalte „gesundheitliche Verbesserung, wenn“) Abkürzungen: n (Größe der Stichprobe), IG (Interventionsgruppe), WKG (Wartekontrollgruppe), M (Mittelwert), SD (Standardabweichung) * Mit ausgleichenden Bewegungen sind Bewegungsübungen gemeint, welche beanspruchte Muskelgruppen & Strukturen im Berufsalltag entlasten sollen z.B. Dehnung der Rückenmuskulatur nach einem Arbeitstag, Achten auf rückenschonendes Arbeiten oder Spazierengehen. **mindestens 10 Minuten ohne Unterbrechung Sport, Fitness oder körperliche Aktivitäten in der Freizeit aus. Schließen Sie bei der Beantwortung der nächsten Frage die körperliche Aktivität bei der Arbeit aus. Denken Sie bei den folgenden Fragen an Sport, Fitness und körperliche Aktivität in der Freizeit, welche mindestens zu einem leichten Anstieg der Atem- oder Herzfrequenz führen. Zum Beispiel (Nordic-) Walking, Ballsport, Joggen, Fahrradfahren, Schwimmen, Aerobic, Rudern, Badminton oder Radfahren. *** körperliche Aktivität aus, die speziell für den Aufbau oder die Kräftigung der Muskulatur gedacht sind? Zum Beispiel Krafttraining oder Kräftigungsübungen (mit Gewichten, Thera-Band, eigenem Körpergewicht), Kniebeugen, Liegestützen oder Sit-ups. Geben Sie hier alle Aktivitäten dieser Art an, selbst wenn Sie sie vorher bereits einbezogen haben. **** Wie viel Zeit verbringen Sie insgesamt in einer typischen Woche mit Sport, Fitness oder körperlicher Aktivität in der Freizeit? ***** Schmerzmittel (Medikamente zur Schmerzlinderung); Schlafmittel (Pflanzlich oder synthetisch hergestellte Mittel, die den Schlaf fördern); Beruhigungsmittel (Unter Beruhigungsmitteln oder Sedativa verstehen wir pflanzliche oder synthetisch hergestellte Medikamente, die eine allgemein beruhigende bzw. aktivitätsdämpfende Wirkung haben); Antidepressiva (Antidepressiva sind Arzneimittel, mit denen eine Depression behandelt wird. Sie heben die Stimmung, wirken aber unterschiedlich auf den Antrieb, die Motivation und die Lust, etwas zu unternehmen) | | | | | | | | | | | |
