# Supplementary material for: Gesundheitsförderung, Stresserleben und Arbeitszufriedenheit bei Pflegeauszubildenden
Source: Springer Nature journal article supplement (doi:10.1007/s11553-024-01101-7), 2024-02-14
Supplement: MOESM10 [file 26733586]

# Onlinematerial 10: Bewertung der Workshops 0,5 Monate nach dem letzten Workshop (Zustimmung auf Skala von 1 (stimme nicht zu) – 5 (stimme völlig zu))

|  |  | **Gesamt (IG T1 & WKG T3; n=99)** | | | | **Gruppenvergleich** |
| --- | --- | --- | --- | --- | --- | --- |
|  |  | *M* | *SD* | *Median* | *Fehlend in %* | *p-Wert (zweiseitig)* |
| **Training Evaluation Inventory – Dimension: Workshop-Outcome** | |  |  |  |  |  |
|  | Die Workshops haben mir generell gefallen. | 4,04 | 1,02 | 4 | 51% | 0,59 |
|  | Ich werde das Gelernte im beruflichen Alltag anwenden. | 3,19 | 1,16 | 3 | 52% | 0,43 |
|  | Zeit in diese Workshops zu investieren war sinnvoll. | 3,55 | 1,12 | 4 | 51% | 0,45 |
|  | Ich finde die Workshops nützlich für meinen Beruf. | 3,59 | 1,15 | 4 | 51% | 0,31 |
|  | Ich denke, ich werde auch einige Zeit nach den Workshops noch berichten können, was ich gelernt habe. | 3,70 | 1,02 | 4 | 53% | 0,49 |
|  | Ich bin thematisch in den Workshops mitgekommen. | 4,43 | 0,83 | 5 | 53% | 0,70 |
| **Training Evaluation Inventory – Dimension: Workshop-Design** | |  |  |  |  |  |
|  | Ich konnte echte Probleme bearbeiten und darin die zuvor gelernten Inhalte vertiefen. | 3,18 | 1,11 |  | 51% | 0,60 |
|  | Ich habe in den Workshops Feedback zu meinem Verhalten/meiner Leistung bekommen. | 3,38 | 1,23 | 4 | 54% | 0,81 |
|  | Mir ist klar geworden, wie ich die behandelten Themen im Arbeitsalltag anwenden kann. | 3,68 | 1,07 | 4 | 53% | 1,00 |
|  | Ich konnte das Gelernte in den Workshops üben. | 3,89 | 0,98 | 4 | 55% | 0,72 |
|  | Inhalte wurden mit konkreten Beispielen erläutert. | 3,91 | 1,03 | 4 | 54% | 0,74 |
|  | Ich konnte mein eigenes Wissen in die Workshops mit einbringen. | 3,98 | 1,02 | 4 | 52% | 0,34 |
|  | Der Trainer/Die Trainerin machte deutlich, welches die zentralen Punkte der besprochenen Themen waren. | 4,28 | 0,93 | 5 | 54% | 0,97 |
| **Interner Evaluationsbogen des Interventionsanbieters** | |  |  |  |  |  |
|  | Der Trainer/Die Trainerin besitzt fundiertes und umfassendes Wissen über die Themen des Workshops. | 4,30 | 0,99 | 5 | 54% | 0,58 |
| Abkürzungen: n (Größe der Stichprobe), M (Mittelwert), SD (Standardabweichung), IG (Interventionsgruppe), WKG (Wartekontrollgruppe) | | | | | | |
